# Supplementary material for: TNPs as a novel fluorescent sensor for the selective recognition of fast green FCF: a spectrofluorimetric approach
Source: Royal Society of Chemistry journal article supplement (doi:10.1039/c5ra09835a), 2015-01-01
Supplement: c5ra09835a1.pdf [file c5ra09835a1.pdf]

## Supporting Information:

### TNPs as a novel fluorescent sensor for selective recognition of fast green FCF: Spectrofluorimetric Approach

Dattatray K. Dalavi,<sup>a</sup> Avinash Kamble,<sup>a</sup> Dhanaji P. Bhopate,<sup>a</sup> Prasad G. Mahajan,<sup>a</sup> Govind B. Kolekar<sup>a</sup> and Shivajirao R. Patil\*<sup>a</sup>

<sup>a</sup>Fluorescence Spectroscopy Laboratory,  
Department of Chemistry, Shivaji University Kolhapur.

**Table S1: Estimated fluorescence decay profile**

| TNPs with Amount of<br>fast green FCF dye<br>added ( $\mu\text{g L}^{-1}$ ) | Average fluorescence<br>lifetime |
|-----------------------------------------------------------------------------|----------------------------------|
| 0.0                                                                         | 2.920                            |
| 1.0                                                                         | 2.870                            |
| 2.0                                                                         | 2.865                            |
| 3.0                                                                         | 2.865                            |
| 4.0                                                                         | 2.860                            |
| 5.0                                                                         | 2.860                            |
| 6.0                                                                         | 2.850                            |
| 7.0                                                                         | 2.850                            |

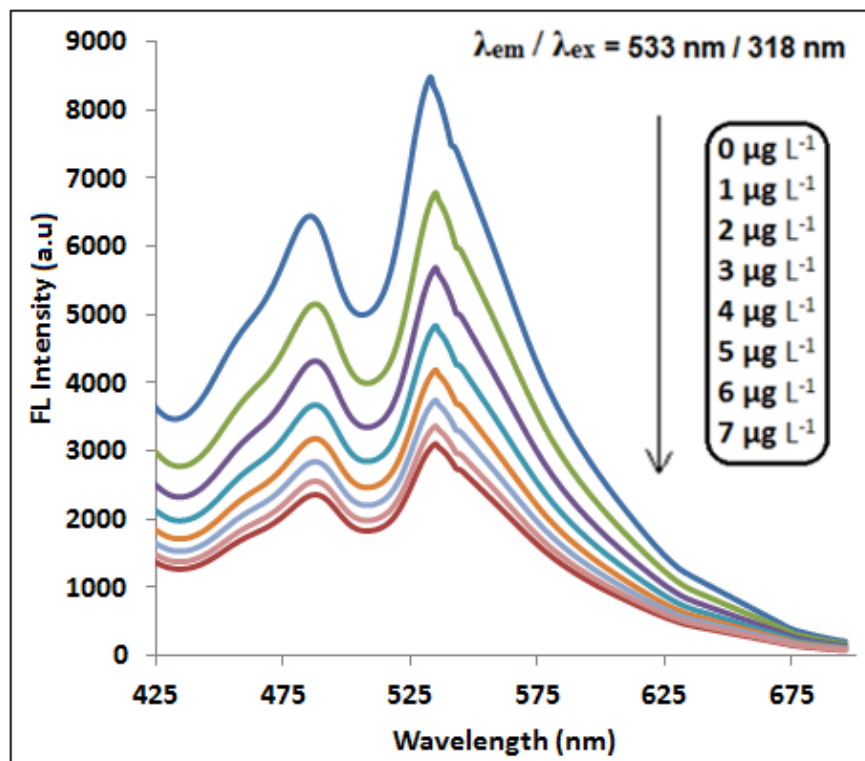

**Fig. S1** FL spectra of TNPs suspension ( $2 \mu\text{g L}^{-1}$ ) in the presence of increasing concentration of fast green FCF dye ( $0, 1, 2, 3, 4, 5, 6, 7 \mu\text{g L}^{-1}$ )
